1 **Polymorphic Inverted Repeats near coding genes**  
2 **impact chromatin topology and phenotypic traits in**  
3 ***Arabidopsis thaliana***

4

5 Agustín L. Arce<sup>1,7</sup>, Regina Mencia<sup>1,7</sup>, Damian A. Cambiagno<sup>1,6</sup>, Patricia L.  
6 Lang<sup>2,4</sup>, Chang Liu<sup>5</sup>, Hernán A. Burbano<sup>3,4</sup>, Detlef Weigel<sup>4</sup>, Pablo A. Manavella<sup>1\*</sup>

7

8 <sup>1</sup>Instituto de Agrobiotecnología del Litoral (CONICET-UNL), Cátedra de Biología  
9 Celular y Molecular, Facultad de Bioquímica y Ciencias Biológicas, Universidad  
10 Nacional del Litoral, 3000 Santa Fe, Argentina.

11 <sup>2</sup>Department of Biology, Stanford University, Stanford, USA.

12 <sup>3</sup>Centre for Life's Origin and Evolution, University College London, London,  
13 United Kingdom.

14 <sup>4</sup>Department of Molecular Biology, Max Planck Institute for Biology Tübingen,  
15 72076 Tübingen, Germany.

16 <sup>5</sup>Department of Epigenetics, Institute of Biology, University of Hohenheim,  
17 Garbenstraße 30, 70599 Stuttgart, Germany

18 <sup>6</sup>Current address: Unidad de Estudios Agropecuarios (UDEA), INTA-CONICET,  
19 Córdoba, Argentina.

20 <sup>7</sup>These authors contributed equally

21 \*To whom correspondence should be addressed. E-mail  
22 [pablomanavella@ial.santafe-conicet.gov.ar](mailto:pablomanavella@ial.santafe-conicet.gov.ar)

23

24

25

## 26 **Abstract**

27 Transposons are mobile elements that are commonly silenced to protect  
28 eukaryotic genome integrity. In plants, transposable elements (TEs) can be  
29 activated during stress conditions and subsequently insert into gene-rich regions.  
30 TE-derived inverted repeats (IRs) are commonly found near plant genes, where  
31 they affect host gene expression with potentially positive effects on adaptation.  
32 However, the molecular mechanisms by which these IRs control gene expression  
33 is unclear in most cases. Here, we identify in the *Arabidopsis thaliana* genome  
34 hundreds of IRs located near genes that are transcribed by RNA Polymerase II,  
35 resulting in the production of 24-nt small RNAs that trigger methylation of the IRs.  
36 The expression of these IRs is associated with drastic changes in the local 3D  
37 chromatin organization, which alter the expression pattern of the hosting genes.  
38 Notably, the presence and structure of many IRs differ between *A. thaliana*  
39 accessions. Capture-C sequencing experiments revealed that such variation  
40 changes short-range chromatin interactions, which translates into changes in  
41 gene expression patterns. CRISPR/Cas9-mediated disruption of two of such IRs  
42 leads to a switch in genome topology and gene expression, with phenotypic  
43 consequences. Our data demonstrate that the insertion of an IR near a gene  
44 provides an anchor point for chromatin interactions that can profoundly impact  
45 the activity of neighboring loci. This turns IRs into powerful evolutionary agents  
46 that can contribute to rapid adaptation.

47

## 48 **Introduction**

49 Transposable elements (TEs) are widely distributed among eukaryotic genomes.  
50 In a process known as transposition, TEs move within the genome to different  
51 locations, usually copying themselves as they 'jump' (Dubin et al., 2018). Plant  
52 genomes are particularly rich in TEs and repetitive elements, which, for example,  
53 account for 85% of the maize genome (Schnable et al., 2009). In plants, TEs are  
54 commonly silenced through DNA methylation in a process known as RNA-  
55 directed DNA methylation (RdDM), which maintains genome integrity (Matzke et  
56 al., 2015). To trigger RdDM, short RNA Polymerase IV (RNAPIV)-dependent TE  
57 transcripts are converted into double-stranded RNA (dsRNA) by the RNA-  
58 dependent RNA polymerase 2 (RDR2) and then to 24 nt small interfering RNAs  
59 (siRNAs) by DICER-Like 3 (DCL3) (Matzke et al., 2015; Zhou and Law, 2015).  
60 ARGONAUTE 4 (AGO4)-loaded siRNAs then direct de novo methylation of the  
61 TE loci by recognizing nascent RNAPV transcripts there. Such methylation  
62 ultimately leads to nucleosome condensation and permanent silencing of the TE.  
63 Still, massive bursts of TE amplification have occurred in plant genomes in  
64 addition to the rarer, but continued movement of individual elements (Lu et al.,  
65 2012; Maumus and Quesneville, 2014; SanMiguel et al., 1998). Stress can trigger  
66 the activation of TEs and fuel transposition (Baduel et al., 2021; Tittel-Elmer et  
67 al., 2010). TEs are thus significant contributors to genetic variation in plant  
68 genomes (Baduel et al., 2021; Collier and Largaespada, 2007; Deragon et al.,

69 2008) and have been postulated as drivers of genome evolution and expansion,  
70 as well as developmental plasticity and adaptation (Dubin *et al.*, 2018; Lisch,  
71 2013).

72 There are two main classes of TEs: DNA transposons and retrotransposons. The  
73 most abundant DNA transposons are miniature inverted-repeat TEs (MITEs),  
74 while the most abundant retrotransposons are long terminal repeat  
75 retrotransposons (LTRs) (Dubin *et al.*, 2018). MITEs exhibit characteristic  
76 terminal inverted repeats (TIRs) and small direct repeats (target site duplications,  
77 TSDs), but lack transposase sequences, making them non-autonomous  
78 elements (Fattash *et al.*, 2013; Yang *et al.*, 2009). Many TE-derived inverted  
79 repeated (IR) insertions may not be classified as MITE as they lack the above-  
80 mentioned components of MITEs, either due to deletions after insertion, or  
81 because they were generated through a different process. MITEs are commonly  
82 situated near coding genes: for example, almost 60% of rice genes can be  
83 associated with a MITE (Lu *et al.*, 2012), with the MITEs often changing the  
84 expression of neighboring genes (Lu *et al.*, 2012; Underwood *et al.*, 2022; Wu *et*  
85 *al.*, 2022; Xu *et al.*, 2020; Zhang *et al.*, 2016). Based on this, MITEs have been  
86 proposed to play important roles in genome evolution and gene expression (Lu  
87 *et al.*, 2012). One key feature of MITEs is that their transcripts can fold into  
88 hairpin-shaped dsRNAs due to the extensive sequence complementarity  
89 between IR arms. These dsRNA secondary structures are recognized and  
90 processed by DCL3 to produce 24-nt siRNAs that trigger DNA methylation  
91 without the need for RNAPIV/RDR2 activity (Ariel and Manavella, 2021;  
92 Crescente *et al.*, 2022; Cuerda-Gil and Slotkin, 2016; Gagliardi *et al.*, 2019;  
93 Sasaki *et al.*, 2014). Thus, transcripts of these MITEs can be initiated from  
94 promoters of adjacent genes, triggering their RNA Polymerase II (RNAPII)-  
95 dependent DNA methylation. At the sunflower *HaWRKY6* locus, the RNAPII-  
96 mediated transcription of a MITE triggers the methylation of its coding region and  
97 causes the formation of alternative regulatory short-range chromatin loops in the  
98 locus that specifically change its expression (Gagliardi *et al.*, 2019).

99 Three-dimensional chromatin organization has recently emerged as a critical  
100 feature determining genome functionality, fine-tuning gene expression and  
101 developmental responses in plants (Domb *et al.*, 2022; Zhang and Wang, 2021).  
102 Short-range chromatin loops reflect interaction between relatively close regions  
103 of DNA, within a few kb, generally within a single locus or between adjacent loci  
104 (Gagliardi and Manavella, 2020). Different from canonical regulation by mC  
105 methylation in the linear DNA sequence, commonly associated with gene  
106 repression, local three-dimensional chromatin organization can induce a plethora  
107 of regulatory mechanisms, including transcriptional activation/repression,  
108 transcription directionality, alternative splicing, the usage of cryptic termination  
109 sites, impaired or enhanced RNAPII elongation, DNA replication and repair  
110 (Gagliardi and Manavella, 2020; Grzechnik *et al.*, 2014; Sotelo-Silveira *et al.*,  
111 2018).

112 In this study, we show that TE-derived IR elements located near genes in the  
113 *Arabidopsis thaliana* genome can cause rearrangements of the chromatin  
114 topology, promoting the formation of short-range chromatin loops. These  
115 chromatin interactions, which depend on the production of IR-derived siRNAs and  
116 *de novo* DNA methylation, often translate into changes in gene expression. The  
117 presence of an IR and its associated chromatin loop near a gene does not cause  
118 a uniform regulatory effect, and can either enhance or repress expression  
119 depending on the locus and which regions within the locus are part of the loop.  
120 Almost one third of the identified gene-associated IRs are not conserved among  
121 a set of 216 *A. thaliana* natural accessions. Our data show that polymorphisms  
122 in IRs near genes can be coupled with a change in the chromatin topology of the  
123 region. These accession-related changes in chromatin landscapes controlled by  
124 IRs can be linked to alteration in traits commonly associated with adaptation, such  
125 as flowering. In proof-of-concept experiments, we used CRISPR/Cas9 genome  
126 editing to mimic the situation in natural accessions lacking specific IRs, and  
127 demonstrated that the IRs help to shape chromatin topology, which in turn can  
128 control molecular and organismal phenotypes. We found that IRs downstream of  
129 *PHYC* and *CRY1* cause the formation of repressive chromatin loops associated  
130 with well-defined developmental phenotypes of some natural accessions.  
131 Overall, our data demonstrate that TE-derived IRs can produce changes in  
132 chromatin topology, gene expression, and ultimately phenotypic changes through  
133 their capacity to trigger DNA methylation autonomously. Given the propensity of  
134 TEs to activate during stress responses and the tendency of IRs to locate near  
135 coding genes, our finding provides a scenario for these TEs to drive local  
136 adaptation and domestication by supporting rapid and sometimes drastic  
137 changes in 3D chromatin organization and gene activity after single-set  
138 mutational events.

139

## 140 **Results**

141

### 142 **TE-derived IRs located near genes impact the local chromatin topology in** 143 ***Arabidopsis***

144 A TE-derived IR element located ~600 bp upstream of the *HaWRKY6* locus in  
145 sunflower serves as an anchor point for the formation of two short-range  
146 chromatin loops, and thereby promotes changes in local chromatin topology  
147 (Gagliardi *et al.*, 2019). The ultimate outcome is the methylation of the locus, due  
148 to 24-nt siRNAs produced after RNAPII-dependent transcription of these IRs. In  
149 leaves, this leads to the formation of a repressive loop, while it promotes a  
150 second, larger, loop that enhances transcription in cotyledons (Gagliardi *et al.*,  
151 2019).

152 Because TE-derived IRs are frequently located near genes (Guo *et al.*, 2017), we  
153 wondered whether the *HaWRKY6* case was just one example of a more general  
154 phenomenon in plants. To evaluate if the insertion of an IR near a gene changes  
155 local chromatin topology and gene expression, we first aimed to identify all IRs

156 neighboring protein-coding genes in the *A. thaliana* Col-0 reference genome.  
157 Using *einverted* from the EMBOSS program suite (Rice et al., 2000), we found a  
158 total of 885 IRs in the *A. thaliana* genome, 634 of them near annotated protein  
159 coding genes (222 of which were located within 500 bp upstream or downstream  
160 of a protein coding gene, a further 163 between 500 bp and 1,000 bp from a gene,  
161 and 249 between 1,000 and 3,000 bp from a gene) (Fig. 1A). IRs were found  
162 within 500 bp of 260 unique genes, within 500 to 1,000 bp of 215 unique genes,  
163 and within 1,000 to 3,000 bp of 615 unique genes (Fig. 1A). These IRs have a  
164 broad genome-wide distribution, with many located in the gene-rich chromosome  
165 arms, and others in gene-poor/TE-rich pericentromeric regions (Fig. 1B).  
166 Analyzing the overlap with annotated transposable elements (TEs) revealed that  
167 68% of the IRs within 3,000 bp of a gene were clearly of TE origin, with most  
168 (~44%) from the MuDR superfamily and 18% from the Helitron superfamily (Fig.  
169 1C). These percentages remain invariable despite of the distance from the IR to  
170 the hosting gene although a moderate enrichment is LTR/Gypsy TEs between  
171 IRs not associated with genes (Fig. 1C). Using the plaNETseq dataset of RNAPII  
172 associated nascent transcripts (Kindgren et al., 2020), we found that more than  
173 half of the identified gene-associated IRs are transcribed by RNAPII (Fig. 1D).  
174 Supporting the idea that these IRs are transcribed from promoters of nearby  
175 genes, the fraction of IRs transcribed by RNAPII increases the closer the IRs are  
176 to a gene (Fig. 1D). Conversely, IRs located far from annotated genes were less  
177 likely to give rise to RNAPII transcripts. Instead, their transcription likely depends  
178 on the canonical RNAPIV/RDR2 RdDM pathway (Fig. 1D).  
179 With small RNA (sRNA)- and bisulfite (BS)-sequencing, and paralleling what we  
180 observed in the case of the *HaWRKY6* adjacent IR, we found that most of the  
181 identified IRs near genes produce RNAPII transcripts (Fig. 1D), giving rise to 24-  
182 nt siRNAs (486/634 IRs 3000bp away from genes), and are associated with CHG  
183 and CHH methylation (Fig. 1E). We often observed an additional peak of  
184 methylation, which could represent a second anchor point for chromatin loop  
185 formation, either on the opposite border or inside of many genes located near IRs  
186 (Fig. S1), once more providing a scenario similar to that of the *HaWRKY6* locus  
187 where two close-by methylated regions served as anchor points for regulatory  
188 short-range chromatin loops.  
189 To investigate whether the identified IRs, especially those producing siRNAs and  
190 DNA methylation, impact local chromatin organization, we extracted RNA and  
191 DNA from Col-0 wild-type plants, triple *dcl2*, *dcl3*, *dcl4* (*dcl234*) mutants (which  
192 are impaired in 24-nt siRNA production) (Lu et al., 2006), and triple *drm1*, *drm2*,  
193 *cmt3* (ddc) mutants (impaired in CHH methylation) (Kurihara et al., 2008), and  
194 performed RNA-seq, sRNA-seq, BS-seq, and Capture-C. As the sequencing  
195 depth required to detect short-range chromatin interaction through standard Hi-C  
196 would be enormous, we selected 290 loci containing IRs and 40 control loci and  
197 performed a Capture-C experiment to only focus on these regions and increase  
198 the chances to detect local chromatin loops. A test mapping of Capture C reads  
199 confirmed the enrichment on the captured regions compared to the input HiC

200 samples (Fig. S2A). Collectively, the designed probes cover ~1% of the genome.  
201 After Capture-C we increased the ratio of reads mapping the targeted regions 40  
202 times in average (Fig. S2B).  
203 sRNA-seq revealed that 486 out of the 634 IRs 3000 bp from genes produce 24  
204 nt siRNAs (Fig. 2A), with siRNA levels severely reduced in both *dcl234* and *ddc*  
205 mutants, as expected for this class of small RNAs (Fig. 2A). Both CHG (~50%)  
206 and CHH (~70%) methylated regions strongly overlapped with IRs within 500 bp  
207 from genes (Fig. 1E), and methylation in both contexts is reduced in both in  
208 *dcl234* and *ddc* for many IRs as expected by the reduction in siRNAs in these  
209 genotypes (Fig. 2B). The proportion of IRs with reduced methylation in the  
210 mutants is slightly higher for those within 500 bp of genes compared to the other  
211 analyzed distance windows (Fig S2C). Changes in siRNAs and methylation were  
212 correlated, consistent with a drop of siRNAs leading to reduced methylation in  
213 RdDM impaired mutants (Fig. 2C). Altogether, these data suggest that a large  
214 proportion of IRs located near genes and transcribed by RNAPII may be able to  
215 trigger DNA methylation in *cis* through the non-canonical RdDM pathway.  
216 As in the case of the *HaWRKY6* locus in sunflower, our data suggest that IRs  
217 located near genes can act as regulatory elements changing the epigenetic  
218 landscape of the region. In order to assess the impact of IR methylation on the  
219 surrounding chromatin organization, we used the software CHESSE to compare  
220 the structural similarity (SSIM) of the IR-host regions between wild type and  
221 mutants (Galan et al., 2020). We also statistically determined the specific anchor  
222 points of chromatin loops in each sample using capC-Map (Buckle et al., 2019)  
223 in combination with peakC (Geeven et al., 2018). Analyzing individual loops, we  
224 found clear alterations in the chromatin topology in several randomly picked loci  
225 (Fig. 2D and S3). To compare the differential methylation-related changes in  
226 loops formed near IRs, we calculated the SSIM for each captured region plus 10  
227 kb on each end in wild type and siRNA- or methylation-deficient mutants. The  
228 choice of a global similarity measure, the SSIM, to study short-range chromatin  
229 changes, rather than comparing individual loops, aimed at increasing the power  
230 to detect reliable differences, as random interactions increase with shorter  
231 distances and increase the methodological background noise. Moreover, other  
232 interactions, caused by dimerization of DNA-bound transcription factors or  
233 nucleosome packing, can also impact such analyses. Chromatin organization of  
234 the IR-containing loci, which should have SSIM values ~1 if similar between the  
235 genotypes, were often changed in *ddc* and *dcl234* mutants (Fig. 2E), indicating  
236 that (IR-triggered) methylation has a substantial effect on the local 3D topology.  
237 Such differences are less pronounced when comparing *ddc* with *dcl234* as could  
238 be expected from the methylation deficiency observed in both, therefore lacking  
239 the anchor points for loop formation (Fig. 2E).  
240 Changes in chromatin topology can affect gene expression (Domb *et al.*, 2022).  
241 Given the alterations in chromatin topology that we found, we wondered whether  
242 they impact gene expression. Formation of a chromatin loops may repress or

243 activate gene transcription, or even trigger production of alternative transcripts  
244 (Gagliardi and Manavella, 2020).

245 We found 4,305 differentially expressed genes (DEGs) in the *ddc* mutant in com-  
246 parison with Col-0, and 3,636 DEGs in *dcl234*, many of them overlapping be-  
247 tween the two mutants (Fig. S4A). When we compared the SSIMs in regions with  
248 DEGs with SSIMs in regions without DEGs we found topological differences  
249 (lower SSIM) to be significantly increased in regions that included DEGs (Fig.  
250 2F). We then split those differences into regions linked to differentially and not  
251 differentially methylated IRs, which revealed greater topological differences in  
252 *ddc* mutants for regions both including DEGs and differentially methylated IRs  
253 (Fig. S4B). Methylation seemed to affect the SSIM correlation with DEGs less  
254 clearly in *dcl234* (Fig. S4C). Loci with altered topology in *ddc* and *dcl234* included  
255 both up- and downregulated genes (Fig. 2F). Thus, changes in chromatin topol-  
256 ogy caused by an impaired RdDM machinery could be linked to opposite changes  
257 in gene expression depending on the loci. This observation, also detected in rice  
258 for genes adjacent to MITEs (Lu *et al.*, 2012), fits with short-range chromatin  
259 loops affecting RNAPII activity in different ways, depending on which part of the  
260 gene is included in the loop (Gagliardi and Manavella, 2020).

261 In summary, our data indicated that the insertion of an IR near a gene can trigger  
262 changes in the local chromatin topology that ultimately affect gene expression in  
263 a locus- and loop-dependent way.

264

### 265 **The absence of IRs near genes between Arabidopsis accessions causes** 266 **natural variation in the local chromatin topology**

267 TEs are commonly silenced in plants as a means of protecting genome integrity.  
268 However, under extreme stress conditions TE transcription can be reactivated,  
269 giving TEs the potential to jump in the genome in a process that has been  
270 proposed to help adaptation to new environments (Ito *et al.*, 2011; Tittel-Elmer *et*  
271 *al.*, 2010). We wondered whether the IRs we were studying could have adaptive  
272 potential to change the structure of the RNAs produced by a locus or their  
273 expression, through changes in the 3D chromatin organization.

274 To test this hypothesis, we first used published TE polymorphism datasets (Stuart  
275 *et al.*, 2016) to detect variations in the TE content of 216 *A. thaliana* genomes  
276 (Schmitz *et al.*, 2013). Narrowing this down further to the 634 IRs located within  
277 3,000 bp upstream or downstream of annotated genes in the Col-0 reference  
278 genome, we found 193 of these 634 IRs to be variable between the 216  
279 accessions studied (Fig. 3A). IRs without a clear TE origin are underrepresented  
280 in the collection of polymorphic IRs (Fig. 3A). These 193 IRs are located within  
281 3,000 bp of 368 annotated genes. This implies that each IR can influence two or  
282 more adjacent genes in many cases, an observation that is not surprising given  
283 the compact nature of *A. thaliana* genomes. To investigate the effect that the  
284 variation in the IR content may have on local chromatin topology and gene  
285 expression, we repeated the Capture-C, RNA-seq, BS-seq, and sRNA-seq  
286 analyses in the Ba1 and Hod accessions. We selected these two accessions

287 based on the number of variable IRs present in each of them (46 and 31 IRs  
288 present in Col-0 are missing in Hod and Ba-1, respectively, with 18 missing in  
289 both accessions). With the Capture-C experiment, we captured 290 regions  
290 comprising the genomic sequences around variable IRs which included adjacent  
291 genes. The analysis of individual loci revealed that the presence of an IR at a  
292 locus correlated with the accumulation of 24 nt siRNAs and with distinctive short-  
293 range chromatin loops (Fig. 3B and S3).

294 We chose five potential candidate genes (*PHV*, *PHYC*, *P5CS1*, *PHR1*, *CRY1*) to  
295 evaluate the effect of polymorphic IRs on loop formation and gene expression.  
296 We corroborated by Sanger sequencing that each of the loci has IRs in Col-0, but  
297 not in the indicated accessions (Fig. 4B, 4G, and S5). We then used Chromatin  
298 Conformation Capture (3C) followed by qPCR to confirm and quantify the  
299 formation of IR-dependent chromatin loops at these loci, and RT-qPCR to  
300 measure correlation with gene expression in each locus (Fig. 3C, 4C, and 4I). We  
301 detected alternative chromatin loops at *PHV*, *P5CS1*, and *PHR1* (Fig. 3C). In the  
302 case of *PHV*, loop 1 appeared to form independently of the associated IR, but  
303 loops 2 and 3 were missing in Ba-1, the accession without the IR, or in *dcl234*  
304 mutants (Fig. 3C). For *P5CS1*, loop 2 appeared independently of the presence of  
305 the IR while the formation of an intragenic loop 1 correlated with the presence of  
306 the IR or a functional RdDM machinery (Fig. 3C). Both for *PHV* and *P5CS1* the  
307 absence of a loop-triggering IR appeared to be associated with enhanced gene  
308 expression (Fig. 3C). In the case of *PHR1*, we found that the formation of a loop  
309 1 depends on the presence of the IR, which is missing in the Hod accessions, but  
310 loop 2 was only formed when the IR is missing, probably reflecting a hierarchy of  
311 chromatin interactions controlled by the IR (Fig. 3C). Contrary to the results with  
312 *PHV* and *P5CS1*, the absence of the IR near *PHR1* caused repression of the  
313 gene.

314 When we analyzed the genome-wide effects of insertional IR polymorphisms over  
315 genome topology using CHESS, we also found a drastic change in chromatin  
316 folding associated with the presence/absence of an IR (Fig. 3D). For this analysis  
317 we calculated the difference between the SSIMs obtained from the comparison  
318 of Ba-1 and Hod genome topology against Col-0, as recommended by the  
319 authors of CHESS, to have a common reference to score differences between  
320 these accessions (Galan *et al.*, 2020). As it can be observed in Figure 3D, the  
321 difference in SSIMs are greater when Ba-1 shares the IR with Col-0, having a  
322 higher SSIM, but it is absent in Hod resulting in a lower SSIM and an increased  
323 positive difference.

324 These data suggest that the insertion of an IR near coding genes can have an  
325 impact on local chromatin topology that affects gene expression. Aiming to  
326 explore whether this could potentially have adaptive consequences, we asked  
327 whether there is a correlation between the presence/absence of an IR near a  
328 gene and well-defined phenotypic traits recorded in the Arapheno database  
329 (Seren *et al.*, 2017). This analysis revealed an association between IR insertional  
330 polymorphisms near some genes with a given phenotype related to flowering, a



331 typically adaptative trait (Fig. 3E). This observation suggests that insertion of an  
332 IR near a gene can not only impact the local chromatin topology, but that it may  
333 also have adaptive implications by changing the phenotypes controlled by the  
334 adjacent gene.

335

### 336 **The insertion of an IR near genes causes strong phenotypic effects**

337 Our data suggest that the insertion of an IR near a gene can be a significant event  
338 during adaptative evolution. However, this association may not be caused by the  
339 IR itself, but by adjacent polymorphisms that may be in linkage disequilibrium with  
340 the IR. In addition, even if the association is with the IR itself, it may not involve  
341 changes in the genome topology. To study this possibility we selected two loci,  
342 *PHYC* and *CRY1*, which display natural variation in the presence/absence of a  
343 close-by IR that is associated with developmental phenotypes (Fig. 3E). Both  
344 *PHYC* and *CRY1* associated IRs are located downstream of the transcription  
345 termination site (TTS) (Fig. 4A and 4F), thus making it less likely that they act  
346 directly on the promoter of the genes as general regulatory elements.

347 *PHYC* encodes a photoreceptor capable of sensing red light (R) and far-red light  
348 (FR) and is implicated in several developmental transitions, such as flowering,  
349 seed germination and hypocotyl elongation (Chen et al., 2014; Kippes et al.,  
350 2020; Li et al., 2020; Nishida et al., 2013). In Col-0 an IR is located ~500 bp  
351 downstream of the TTS of *PHYC*, while it is missing in several natural accessions,  
352 including, for example, Ey15-2 (Fig. 4A and 4B). To test whether this IR impacts  
353 *PHYC* expression and related phenotypes, we used a CRISPR/Cas9 strategy to  
354 delete a fragment of the IR, with which we can disrupt dsRNA formation without  
355 completely removing the IR sequence (Fig. 4A). Three homozygous lines were  
356 obtained with a deletion of the IR fragment (Fig. 4B). Supporting a role for this IR  
357 in modulating genome topology and gene expression, we detected a chromatin  
358 loop encompassing the entire *PHYC* gene in Col-0 plants that was absent in the  
359 CRISPR mutant lines and in the Ey15-2 accession, which lacks the IR (Fig. 4C).  
360 The absence of the IR, both in Ey15-2 and in the CRISPR lines, correlated with  
361 higher expression of *PHYC*, indicating that the IR promotes the formation of a  
362 repressive loop in Col-0 (Fig. 4C). Both, the CRISPR lines and Ey15-2, had  
363 altered developmental responses related to known *PHYC* functions, including  
364 delayed flowering and shortened hypocotyls under a continuous red-light  
365 treatment (Fig. 4D and 4E). Altogether, our data indicate that the presence of the  
366 IR next to *PHYC* has a substantial impact on gene regulation, by enabling the  
367 formation of a short-range chromatin loop that represses gene expression,  
368 thereby contributing to the differential response of natural accessions to light  
369 signals.

370 *CRY1* is a blue light receptor and participates predominately in the regulation of  
371 blue-light inhibition of hypocotyl elongation and anthocyanin production (Ahmad  
372 et al., 1998; Ahmad et al., 1995; Liu et al., 2022). Two IRs are located near the  
373 gene, ~2,000 bp upstream of the transcription start site (TSS) and ~550 bp

374 downstream of the TTS (Fig. 4F). The second IR is variable among *A. thaliana*  
375 accession, missing, for example, in Hod (Fig. 4G). Using CRISPR/Cas9  
376 engineering, heterozygous lines could be obtained missing a fragment of the IR  
377 located downstream of the TSS (with homozygous lines apparently not being  
378 viable) (Fig. 4H). Similar to *PHYC*, we detected a chromatin loop that brings  
379 together the borders of the *CRY1* gene only in those plants containing the IR and  
380 that represses the expression of the gene (Fig. 4I). The absence of the IR, both  
381 in the CRISPR lines or in the natural accession Hod, correlated with higher  
382 expression levels of *CRY1* and shorter hypocotyls under blue light (Fig. 4I and  
383 4J), a phenotype previously described in *CRY1* overexpressing lines (He et al.,  
384 2019; Liu *et al.*, 2022).

385

## 386 Discussion

387 How organisms can adapt to a rapidly changing environment is one of the most  
388 interesting questions in evolutionary biology (Barrett and Schluter, 2008;  
389 Hermisson and Pennings, 2005). SNPs have been the main focus of many  
390 genomic studies aiming to assess the evolutionary potential of mutations, but TEs  
391 can be particularly powerful actors in rapid adaptation, as single transposition  
392 events can have potentially wide-ranging consequences on gene expression and  
393 derived phenotypes (Baduel *et al.*, 2021). On one side, the broad distribution of  
394 TEs across the genome facilitates the generation of chromosomal  
395 rearrangements through ectopic recombination. Even more significantly, the  
396 mobilization of TEs can disrupt, modify or even change the expression of genes  
397 in various ways that could generate a favorable adaptative trait (Dubin *et al.*,  
398 2018; Friedli and Trono, 2015). New alleles caused by TE insertions have been  
399 proposed to guarantee a consistent supply of potentially adaptable variants in  
400 response to the environment (Baduel *et al.*, 2021). Still, many TEs inserted within  
401 gene-rich areas are quickly purged, according to population genomic surveys of  
402 TE polymorphisms (Quadana *et al.*, 2016). This is in agreement with  
403 transposition tending to produce alleles with negative effects.

404 Contrary to autonomous TEs, MITEs were found to be distributed on  
405 chromosome arms in plants, highly associated with genes, and frequently  
406 transcribed with adjacent genes (Kuang *et al.*, 2009; Lu *et al.*, 2012; Oki *et al.*,  
407 2008). In agreement with this, our study identified numerous TE-derived IRs near  
408 coding genes in *A. thaliana*. Different from rice, where more than half of the genes  
409 are associated with MITEs (Lu *et al.*, 2012), fewer genes are associated with IRs  
410 in *A. thaliana*. This observation is not surprising as Arabidopsis is an outlier  
411 regarding TE content among plants, with only 15% of its genome represented by  
412 TEs. In comparison, they account for 85% of maize and up to ~40% of rice  
413 genomes (Arabidopsis Genome, 2000; Li *et al.*, 2017; Schnable *et al.*, 2009).

414 The association between MITEs and protein coding genes suggested that these  
415 TEs may play essential roles in genome evolution. Current evidence suggests  
416 that siRNA-triggered TE methylation tends to cause the repression of neighboring  
417 genes (Hollister and Gaut, 2009; Hollister *et al.*, 2011). However, in the case of

418 MITEs, both positive and negative effects on the expression of host genes have  
419 been reported (Gagliardi *et al.*, 2019; Underwood *et al.*, 2022; Wu *et al.*, 2022;  
420 Xu *et al.*, 2020; Zhang *et al.*, 2016). The weak correlation between methylation of  
421 MITEs and the expression of adjacent genes can now be better explained in the  
422 light of our findings showing that IRs located near genes affect the local chromatin  
423 organization. While methylation of DNA on its own is expected to have primarily  
424 repressive effects, short-range chromatin loops could produce many different  
425 outcomes, including transcriptional repression/activation and production of  
426 alternative mRNAs (Gagliardi and Manavella, 2020).

427 MITEs have the potential to transpose into various locations in the genome  
428 resulting in the presence/absence (insertional) polymorphisms between  
429 genotypes (Lu *et al.*, 2012; Lyons *et al.*, 2008). Such polymorphism can be  
430 caused by the insertion or excision of a MITE from a locus. However, it is  
431 unknown which of these scenarios contributes more to the genetic variation within  
432 a species. Here, we show that ~30% of the IRs located within 3,000bp of protein  
433 coding genes present insertional polymorphism between 216 *A. thaliana* natural  
434 accessions. Our results also indicate that such natural variation of the gene-  
435 associated IR content can cause changes in chromatin organization that could  
436 be considered "3D polymorphisms". Our experiments using not only association  
437 between IR polymorphisms and gene expression changes, but also  
438 CRISPR/Cas9-editing to demonstrate a causal relationship in several cases,  
439 show that the insertion of an IR near a gene can have a profound impact on  
440 chromatin organization, gene expression, and associated phenotypes. This  
441 phenomenon can potentially boost a plant's capacity to adapt to a rapidly  
442 changing environment. Because IRs can coopt the promoters of adjacent genes  
443 to produce RNAPII-derived siRNAs through a stem-loop dsRNA intermediate,  
444 they can act as autonomous regulatory elements, drastically changing the  
445 chromatin landscape of a locus upon insertion. These characteristics turn IRs into  
446 powerful elements during adaptative evolution.

447 Modelling has suggested faster generation of large-effect alleles due to  
448 larger transposition rates in specific populations in response to global warming  
449 (Baduel *et al.*, 2021). Consistent with this scenario, and in a world of a rapidly  
450 changing climate, the discovery of IRs as elements shaping the 3D chromatin  
451 organization and driving genome adaptation is of great interest. The manipulation  
452 of IRs, and in consequence, genome topology, can potentially become a powerful  
453 biotechnological tool to improve crop adaptation without the need to incorporate  
454 exogenous DNA or alter coding sequences in plants.

455

## 456 **Material and methods**

### 457 **Plant material and growth conditions**

458 *Arabidopsis thaliana* accessions Col 0, Hod, Ba1, EY15-2, *dcl234* (Lu *et al.*  
459 *et al.*, 2006), and *ddc* (Kurihara *et al.*, 2008) mutants and CRISPR mutant lines  
460 were grown at 23°C in long day (16/8 hours light/dark). Blue and red-light  
461 experiments were carried out as follows: seeds were sowed on petri dishes with

462 humidified filter paper and stratified in the dark for 5 days, and then transferred  
463 to white light ( $80 \mu\text{mol m}^{-2} \text{s}^{-1}$ ) at  $23^{\circ}\text{C}$  for 3 hours and subsequently transferred  
464 to red ( $20 \mu\text{mol m}^{-2} \text{s}^{-1}$ ) or blue light ( $5 \mu\text{mol m}^{-2} \text{s}^{-1}$ ) in LED chambers. Hypocotyl  
465 measurements were taken at four days using ImageJ (<http://rsb.info.nih.gov/ij>).

466 To obtain plants with genomic fragments deletions a CRISPR/Cas9 vector  
467 toolbox (Wu et al., 2018) was used. Specific sgRNAs, described in Supplemental  
468 Table S1, were designed to obtain the IRs deletions. Col-0 plants were  
469 transformed using the floral dip method, T1 plants were selected based on the  
470 presence of red fluorescence in seeds under a fluorescent dissecting microscope  
471 (Leica, Solms, Germany), non-fluorescent T2 seeds missing the transgenes were  
472 grown and genotyped by PCR to identify effective deletions.

473 For genomic DNA extraction 100 mg of fresh plant material was ground in  
474 700  $\mu\text{l}$  of extraction buffer (200 mM Tris-HCl pH8, 25 mM EDTA, 0.5% SDS)  
475 and precipitated with isopropanol. PCR was performed using primers detailed in  
476 Table S1. RNA was extracted using TRIzol<sup>TM</sup> Reagent (Invitrogen) following  
477 manufacturer's recommendations.

478 The presence of the IR in different *A. thaliana* accessions was determine  
479 by amplification of the IR region with flanking primers with Q5 polymerase,  
480 followed by Sanger sequencing. For the deletion of the IRs neighboring *PHYC*  
481 and *CRY1*, pairs of sgRNAs targeting each locus were cloned in a CRISPR/Cas9  
482 super module (SM) vector as described (Wu et al., 2018). Briefly, sgRNAs  
483 targeting flanking regions of the IR were designed using the CRISPR-P Web Tool  
484 (Lei et al., 2014). Each sgRNA was introduced into the shuffle vectors by overlap  
485 PCR with Q5 Hi-Fidelity polymerase followed by digestion of the original vector  
486 with *DpnI* (Thermo Scientific). A destination vector harboring *UBQ10* promoter,  
487 pcoCas9, proLacZ:LacZ between both sgRNAs targeting each IR, and  
488 At2S3:mCherry for fluorescence selection in seeds were generated with the  
489 Green Gate assembly system. Destination vectors were transformed into Col-0  
490 plants, and red fluorescence-positive seeds were isolated as hemizygous seeds.  
491 Transgene-free T2 offspring without seed fluorescence were chosen, and plants  
492 were tested by PCR and Sanger sequencing to identify IR deletion lines. All  
493 primers used are listed in Table S1

494

### 495 **IR detection**

496 Inverted repeats were identified in the Col-0 *Arabidopsis thaliana* genome  
497 using einverted, from the EMBOSS program suite (Rice et al., 2000). The  
498 parameters used were: maximum repeat of 1000, a gap penalty of 8, a minimum  
499 score threshold of 150, a match score of 3, and a mismatch score of -4.

500

### 501 **RNA-seq**

502 RNA-seq library preparation was performed as described (Cambiagno et  
503 al., 2021). An in-house scaled-down version of Illumina's TruSeq reaction was  
504 used. mRNA was purified with NEBNext Poly(A) Magnetic Isolation Module (New  
505 England Biolabs, Ipswich, MA) and heat fragmented with Elute-Prime-Fragment

506 buffer (5x first-strand buffer, 50 ng/ml random primers). For first- and second-  
507 strand synthesis SuperScript II Reverse Transcriptase (Thermo Fisher) and DNA  
508 polymerase I (NEB) were used, respectively. T4 DNA polymerase, Klenow DNA  
509 polymerase, T4 polynucleotide kinase (NEB), and Klenow Fragment (30/50 exo-)  
510 (NEB) were used for end repair and A-tailing. Ligation of universal adapters  
511 compatible with Nextera barcodes i7 and i5 was performed with T4 DNA Ligase  
512 (NEB), and Q5 Polymerase (NEB) was used for PCR enrichment using Nextera  
513 i7 and i5 barcodes. SPRI beads were used for DNA purification in each step and  
514 size selection of the library preps. 2 x 150 bp paired-end reads were generation  
515 on the Illumina HiSeq 3000 platform.

516 The analysis started by quality trimming and filtering the raw reads with  
517 Trimmomatic version 0.36; (Bolger et al., 2014). They were then aligned to the  
518 Arabidopsis thaliana genome (TAIR10) using STAR version 2.5.2b, (Dobin, 2013  
519 #73), which was guided by the gene and exon annotation from Araport V11  
520 201606, (Pasha et al., 2020). Samtools version 1.; (Li et al., 2009) was then used  
521 to keep only primary alignments with a minimum MAPQ of 3. Read quality before  
522 and after trimming was analyzed with FastQC (version 0.11.5;  
523 <https://www.bioinformatics.babraham.ac.uk/projects/fastqc/>) and, together with  
524 mapping efficiency, they were summarized with MultiQC version 1.7 (Ewels et  
525 al., 2016). Read counts on each gene were then calculated with featureCounts  
526 version 1.6.2 (Liao et al., 2014). This pipeline was run with the aid of the  
527 Snakemake workflow engine (Koster and Rahmann, 2012). Gene counts were  
528 used to identify differentially expressed genes with DESeq2 (Love et al., 2014);  
529 R Core Team 2022) filtering out genes with counts below 10 in all samples.

530

### 531 **sRNA-seq**

532 For sRNA-seq library preparation, 1 µg of total RNA was used as input for  
533 the TruSeq sRNA Library Preparation kit (Illumina) as described in the TruSeq  
534 RNA Sample Preparation v2 Guide (Illumina). BluePippin System (Sage Science)  
535 was used for sRNA library size selections. Sequencing was performed on the  
536 Illumina HiSeq 3000 platform.

537 The small RNA reads generated were first cut to remove 3' adapters using  
538 cutadapt (version 1.9.1) and their quality checked using FastQC (version 0.11.4,  
539 <https://www.bioinformatics.babraham.ac.uk/projects/fastqc/>) and MultiQC  
540 (Ewels et al., 2016). They were then mapped with bowtie (version 1.1.2;  
541 (Langmead et al., 2009)) to *A. thaliana* rRNA, tRNA, snoRNA and snRNA from  
542 RFAM (version 14.1, (Kalvari et al., 2018)). Unmapped reads were then mapped,  
543 also with bowtie, to the *A. thaliana* genome. Statistical analyses were performed  
544 in the R statistical programming environment (R Core Team, 2022) and graphics  
545 were produced with the ggplot package.

546 IRs which had 10 or more 24 nucleotide reads in its entire region were  
547 considered to have potential sRNA production. Changes in sRNA levels were  
548 calculated first calculating reads per million (RPM) mapping reads to the genome

549 in each library, then averaging this value for all replicates in each IR, and then  
550 calculating the log<sub>2</sub> Fold Change between the RPM in the mutant versus Col-0.

551

### 552 **Bisulfite treatment of DNA and library preparation**

553 For BS-seq, DNA extraction was performed with DNeasy plant Mini Kit  
554 (QUIAGEN). DNA was sheared to 350 bp by g by Covaris ultrasonication.  
555 Libraries were generated with Illumina TrueSeq DNA Nano Kit. After adaptor  
556 ligation, libraries were bisulfite converted with the Epitec Plus DNA Bisulfite  
557 Conversion Kit (QUIAGEN). Library enrichment was done using Kapa Hifi Uracil+  
558 DNA polymerase (Kapa Biosystems, USA). Paired-end reads (2 x 150 bp) were  
559 generation on the HiSeq 3000 platform (Illumina).

560 The analysis of these reads started by quality trimming and filtering them  
561 with Trimmomatic (version 0.36; (Bolger *et al.*, 2014)). Then we used the Bismark  
562 program (Krueger and Andrews, 2011) to perform the mapping of the reads to  
563 the *A. thaliana* Col-0 genome, internally done with Bowtie2 (Langmead and  
564 Salzberg, 2012), the deduplication of the alignments and the extraction of the  
565 methylation results in the three contexts: CG, CHG and CHH. This output was  
566 then analyzed in R (R core team, 2022) with the methylKit package (Akalin *et al.*,  
567 2012). Only Cytosines with at least 4 reads were considered, and each sample  
568 was segmented with methSeg and methylation levels were calculated for those  
569 including at least 4 Cs. For Col-0, segments were collapsed for replicates using  
570 the mergeGRangesData function from the BRGenomics package  
571 (<https://rdr.io/bioc/BRGenomics/>) and IRs with repeats overlapping segments  
572 with more than 10 or more percent of CHG or CHH methylation were considered  
573 methylated.

574 Differential methylation in the *ddc* and *dcl234* mutants was also calculated  
575 with the methylKit package. First replicates were combined with the unite function  
576 and then differential methylation calculated with the calculateDiffMeth function,  
577 correcting for overdispersion with the MN method, using a q-value threshold of  
578 0.1 and a differential threshold of 15 %. Then IRs with repeats overlapping any  
579 of these differential segments was considered differentially methylated.

580

### 581 **Capture-C assay**

582 For Capture-C, Hi-C was performed as described (Liu, 2017). Briefly, we  
583 collected 1.5 g of plant tissue, and fixed them with 1% formaldehyde. Nuclei were  
584 isolated and finally washed with NEB buffer #3. Nuclei penetration was done by  
585 resuspending the pellet in 150 µl 0.5% SDS and incubating them at 62 °C for 5  
586 min. After that, 435 ul of water and 75 ul of 10% Triton X-100 were added and  
587 incubated 37 °C for 15 min. NEB buffer #3 was added to 1X, and 50 U of DpnII  
588 to digest the chromatin over night at 37°C. Incubating the digested chromatin with  
589 10 U Klenow, dTTP, dATP, dGTP, and biotin-14-dCTP at 37°C for 2 h, cohesive  
590 ends were filled. Blunt-end ligation of chromatin was performed by adding blunt-  
591 end ligation buffer to 1X and 20 U of T4 DNA ligase at room temperature for 4 h.  
592 Nuclei were lysed with SDS buffer (50 mM Tris-HCl, 1% SDS, 10 mM EDTA,

593 pH 8.0) and incubated with 10 µg proteinase K at 55°C for 30 min. To reverse the  
594 crosslinking, NaCl was added to reach 0.2 M and the samples were incubated at  
595 65 °C overnight. Hi-C DNA was purified by Phenol-Chloroform-IAA method and  
596 RNase A treated. Hi-C DNA was sheared to 500 bp with a Covaris E220  
597 sonicator. DNA was purified and size selected (longer than 300 bp) using Ampure  
598 beads. Unligated biotin was removed in a reaction with 0.1 mM dTTP, 0.1 mM  
599 dATP and 5 U T4 DNA polymerase incubated at 20°C for 30 min. DNA was  
600 purified with Ampure beads and end-repair and adaptor ligation were performed  
601 with the NEBNext® Ultra™ II DNA Library Prep Kit by following the  
602 manufacturer's instructions. Biotin affinity purification was then performed by  
603 using Dynabeads MyOne Streptavidin C1 beads (Invitrogen). Library  
604 amplification was done with Ultra II Q5 Master Mix with universal and selected  
605 index primers.

606 For the Capture step, hybridization capture was performed with the  
607 MyBaits system (Arbor Biosciences) following the manufacturer's instructions.  
608 Baits of 80 nucleotides were designed on each end of the digestion fragments  
609 corresponding to the captured regions. These regions included all genes within  
610 3000 bp of the IR and the spacer region up to the IR, excluding it. When a region  
611 was surrounded by 2 IRs, it was considered a single captured region.

612 Finally, Capture-C DNA was paired-end sequenced (2 × 150 bp reads) on  
613 an Illumina HiSeq 3000. The resulting reads were processed with capC-MAP  
614 (Buckle *et al.*, 2019), which performs the *in silico* genome digestion, read  
615 alignment, the pile-up of interactions, and can generate normalized, binned and  
616 smoothed profiles of interaction for each target. For this the Col-0 genome was  
617 used, an exclusion zone of 500 bp, a bin size of 500 bp and a step of 250 bp. The  
618 results were then processed with the R package peakC (Geeven *et al.*, 2018) to  
619 determine statistically significant interactions. These loops were visualized with  
620 the aid of the R package and Gviz (Hahne and Ivanek, 2016).

621 For the SSIM calculation, raw pileups were first normalized with FAN-C  
622 (Kruse *et al.*, 2020), using the VC-SQRT method on 1000 bp bins. The SSIM  
623 value was obtained on a region comprising the captured region extended by 10  
624 kb on both extremes, and using a relative window size of 0.1.

625

## 626 **Data processing, plotting and statistical analysis**

627 Data obtained in the different analysis of the sequencing experiments was  
628 further processed and statistically analyzed in R (R Core Team, 2022) using a  
629 diversity of packages. Genomic information was handled using GenomicRanges  
630 (Lawrence *et al.*, 2013), Biostrings  
631 (<https://bioconductor.org/packages/Biostrings>) GenomicInteractions (Harmston  
632 *et al.*, 2015) and rtracklayer (Lawrence *et al.*, 2009) packages.

633 Plots summarizing information were mostly performed with the ggplot and  
634 ggpvr packages. Plots of genomic regions were produced with the Gviz (Hahne  
635 and Ivanek, 2016) package. Circular plots were generated with ciclize (Gu *et al.*,  
636 2014).

637

### 638 **Data availability**

639 All sequencing data were deposited at the European Nucleotide Archive  
640 (<https://www.ebi.ac.uk/ena/>) public repository with accession PRJEB53956.

641

### 642 **3C assay and RT-PCR**

643 3C assay was performed as described (Gagliardi *et al.*, 2019). For  
644 detection of loops at *PHV* and *PHYC*, EcoRI (NEB) overnight digestion was  
645 performed; for *P5CS1*, *CRY1*, and *PHR1*, XbaI (NEB) was used. For DNA  
646 ligation, 100 U of highly concentrated T4 DNA ligase (Thermo) were used at 22°C  
647 for 5 h in a 4 mL volume. Reverse crosslinking and proteinase K treatment  
648 (Invitrogen) were performed, and phenol/chloroform method was used for DNA  
649 purification. For interaction frequency measurement, qPCR was performed using  
650 *ACTIN2* as housekeeping gene. All primers used are listed in Table S1.

651 For quantitative RT-PCR, 1 µg of total RNA was used for reverse  
652 transcription reactions using RevertAid RT Reverse Transcription Kit (Thermo  
653 Fisher Scientific). qPCR was performed using SYBR green (Thermo Scientific  
654 Maxima SYBR Green qPCR Master Mix (2x)). Three biological replicates were  
655 used to calculate the standard error of the mean. Standard error of the mean  
656 (SEM) was calculated using propagation of error of the  $2^{-\Delta\Delta C_t}$  values and  
657 expressed in figures as two times the SEM. Statistical significance was tested  
658 using a two-tailed, unpaired Student's t-test. All primers used are listed in Table  
659 S1.

660

661

### 662 **Author contribution**

663 A.L.A. performed the majority of the analyses. D.A.C. prepared the  
664 libraries for sequencing and Capture-C experiments. P.L.L. and H.A.B. helped  
665 with the design of the Capture-C probes. P.L.L. performed the Capture  
666 experiment. R.M. and D.A.C. validated the chromatin loops formations and  
667 created the CRISPR/CAS9 mutant lines. R.M. characterized the CRISPR/Cas9  
668 mutant lines and performed validation experiments. A.L.A., D.A.C., P.A.M., and  
669 D.W. conceived this study; P.A.M. and D.W. supervised the work and secured  
670 project funding; A.L.A., R.M., D.W., and P.A.M. wrote the manuscript.

671

### 672 **Acknowledgments**

673 This work was supported by grants from ANPCyT (Agencia Nacional de  
674 Promoción Científica y Tecnológica, Argentina) and Universidad Nacional del  
675 Litoral (UNL) to P.A.M. and the Max Planck Society to D.W. P.A.M., A.L.A. and  
676 D.A.C. are members of CONICET; R.M. is a fellow of the same institution. We  
677 thank the Deutscher Akademischer Austauschdienst (DAAD) and Company of  
678 Biologists for short-term fellowship to D.A.C. and R.M. respectively.

679



680 **Footnotes**

681 The authors declare no competing interest.

682

683 **References**

684

685 Ahmad, M., Jarillo, J.A., and Cashmore, A.R. (1998). Chimeric proteins between  
686 cry1 and cry2 Arabidopsis blue light photoreceptors indicate overlapping  
687 functions and varying protein stability. *Plant Cell* 10, 197-207.  
688 10.1105/tpc.10.2.197.

689 Ahmad, M., Lin, C., and Cashmore, A.R. (1995). Mutations throughout an  
690 Arabidopsis blue-light photoreceptor impair blue-light-responsive anthocyanin  
691 accumulation and inhibition of hypocotyl elongation. *Plant J* 8, 653-658.  
692 10.1046/j.1365-313x.1995.08050653.x.

693 Akalin, A., Kormaksson, M., Li, S., Garrett-Bakelman, F.E., Figueroa, M.E.,  
694 Melnick, A., and Mason, C.E. (2012). methylKit: a comprehensive R package for  
695 the analysis of genome-wide DNA methylation profiles. *Genome Biol* 13, R87.  
696 10.1186/gb-2012-13-10-r87.

697 Arabidopsis Genome, I. (2000). Analysis of the genome sequence of the  
698 flowering plant Arabidopsis thaliana. *Nature* 408, 796-815. 10.1038/35048692.

699 Ariel, F.D., and Manavella, P.A. (2021). When junk DNA turns functional:  
700 transposon-derived non-coding RNAs in plants. *J Exp Bot* 72, 4132-4143.  
701 10.1093/jxb/erab073.

702 Baduel, P., Leduque, B., Ignace, A., Gy, I., Gil, J., Jr., Loudet, O., Colot, V., and  
703 Quadrana, L. (2021). Genetic and environmental modulation of transposition  
704 shapes the evolutionary potential of Arabidopsis thaliana. *Genome Biol* 22, 138.  
705 10.1186/s13059-021-02348-5.

706 Barrett, R.D., and Schluter, D. (2008). Adaptation from standing genetic variation.  
707 *Trends Ecol Evol* 23, 38-44. 10.1016/j.tree.2007.09.008.

708 Bolger, A.M., Lohse, M., and Usadel, B. (2014). Trimmomatic: a flexible trimmer  
709 for Illumina sequence data. *Bioinformatics* 30, 2114-2120.  
710 10.1093/bioinformatics/btu170.

711 Buckle, A., Gilbert, N., Marenduzzo, D., and Brackley, C.A. (2019). capC-MAP:  
712 software for analysis of Capture-C data. *Bioinformatics* 35, 4773-4775.  
713 10.1093/bioinformatics/btz480.

714 Cambiagno, D.A., Giudicatti, A.J., Arce, A.L., Gagliardi, D., Li, L., Yuan, W.,  
715 Lundberg, D.S., Weigel, D., and Manavella, P.A. (2021). HASTY modulates  
716 miRNA biogenesis by linking pri-miRNA transcription and processing. *Mol Plant*  
717 14, 426-439. 10.1016/j.molp.2020.12.019.

718 Chen, A., Li, C., Hu, W., Lau, M.Y., Lin, H., Rockwell, N.C., Martin, S.S.,  
719 Jernstedt, J.A., Lagarias, J.C., and Dubcovsky, J. (2014). Phytochrome C plays  
720 a major role in the acceleration of wheat flowering under long-day photoperiod.  
721 *Proc Natl Acad Sci U S A* 111, 10037-10044. 10.1073/pnas.1409795111.

722 Collier, L.S., and Largaespada, D.A. (2007). Transposable elements and the  
723 dynamic somatic genome. *Genome Biol* 8 *Suppl* 1, S5. 10.1186/gb-2007-8-s1-  
724 s5.

725 Crescente, J.M., Zavallo, D., Del Vas, M., Asurmendi, S., Helguera, M.,  
726 Fernandez, E., and Vanzetti, L.S. (2022). Genome-wide identification of MITE-  
727 derived microRNAs and their targets in bread wheat. *BMC Genomics* 23, 154.  
728 10.1186/s12864-022-08364-4.

- 729 Cuerda-Gil, D., and Slotkin, R.K. (2016). Non-canonical RNA-directed DNA  
730 methylation. *Nat Plants* 2, 16163. 10.1038/nplants.2016.163.
- 731 Deragon, J.M., Casacuberta, J.M., and Panaud, O. (2008). Plant transposable  
732 elements. *Genome Dyn* 4, 69-82. 10.1159/000126007.
- 733 Domb, K., Wang, N., Hummel, G., and Liu, C. (2022). Spatial Features and  
734 Functional Implications of Plant 3D Genome Organization. *Annu Rev Plant Biol*  
735 73, 173-200. 10.1146/annurev-arplant-102720-022810.
- 736 Dubin, M.J., Mittelsten Scheid, O., and Becker, C. (2018). Transposons: a  
737 blessing curse. *Curr Opin Plant Biol* 42, 23-29. 10.1016/j.pbi.2018.01.003.
- 738 Ewels, P., Magnusson, M., Lundin, S., and Kaller, M. (2016). MultiQC: summarize  
739 analysis results for multiple tools and samples in a single report. *Bioinformatics*  
740 32, 3047-3048. 10.1093/bioinformatics/btw354.
- 741 Fattash, I., Rooke, R., Wong, A., Hui, C., Luu, T., Bhardwaj, P., and Yang, G.  
742 (2013). Miniature inverted-repeat transposable elements: discovery, distribution,  
743 and activity. *Genome* 56, 475-486. 10.1139/gen-2012-0174.
- 744 Friedli, M., and Trono, D. (2015). The developmental control of transposable  
745 elements and the evolution of higher species. *Annu Rev Cell Dev Biol* 31, 429-  
746 451. 10.1146/annurev-cellbio-100814-125514.
- 747 Gagliardi, D., Cambiagno, D.A., Arce, A.L., Tomassi, A.H., Giacomelli, J.I., Ariel,  
748 F.D., and Manavella, P.A. (2019). Dynamic regulation of chromatin topology and  
749 transcription by inverted repeat-derived small RNAs in sunflower. *Proc Natl Acad*  
750 *Sci U S A* 116, 17578-17583. 10.1073/pnas.1903131116.
- 751 Gagliardi, D., and Manavella, P.A. (2020). Short-range regulatory chromatin  
752 loops in plants. *New Phytol* 228, 466-471. 10.1111/nph.16632.
- 753 Galan, S., Machnik, N., Kruse, K., Diaz, N., Marti-Renom, M.A., and Vaquerizas,  
754 J.M. (2020). CHESSE enables quantitative comparison of chromatin contact data  
755 and automatic feature extraction. *Nat Genet* 52, 1247-1255. 10.1038/s41588-  
756 020-00712-y.
- 757 Geeven, G., Teunissen, H., de Laat, W., and de Wit, E. (2018). peakC: a flexible,  
758 non-parametric peak calling package for 4C and Capture-C data. *Nucleic Acids*  
759 *Res* 46, e91. 10.1093/nar/gky443.
- 760 Grzechnik, P., Tan-Wong, S.M., and Proudfoot, N.J. (2014). Terminate and make  
761 a loop: regulation of transcriptional directionality. *Trends Biochem Sci* 39, 319-  
762 327. 10.1016/j.tibs.2014.05.001.
- 763 Gu, Z., Gu, L., Eils, R., Schlesner, M., and Brors, B. (2014). circlize Implements  
764 and enhances circular visualization in R. *Bioinformatics* 30, 2811-2812.  
765 10.1093/bioinformatics/btu393.
- 766 Guo, C., Spinelli, M., Ye, C., Li, Q.Q., and Liang, C. (2017). Genome-Wide  
767 Comparative Analysis of Miniature Inverted Repeat Transposable Elements in 19  
768 *Arabidopsis thaliana* Ecotype Accessions. *Sci Rep* 7, 2634. 10.1038/s41598-017-  
769 02855-1.
- 770 Hahne, F., and Ivanek, R. (2016). Visualizing Genomic Data Using Gviz and  
771 Bioconductor. *Methods Mol Biol* 1418, 335-351. 10.1007/978-1-4939-3578-9\_16.
- 772 Harmston, N., Ing-Simmons, E., Perry, M., Baresic, A., and Lenhard, B. (2015).  
773 GenomicInteractions: An R/Bioconductor package for manipulating and  
774 investigating chromatin interaction data. *BMC Genomics* 16, 963.  
775 10.1186/s12864-015-2140-x.
- 776 He, G., Liu, J., Dong, H., and Sun, J. (2019). The Blue-Light Receptor CRY1  
777 Interacts with BZR1 and BIN2 to Modulate the Phosphorylation and Nuclear

- 778 Function of BZR1 in Repressing BR Signaling in Arabidopsis. *Mol Plant* 12, 689-  
779 703. 10.1016/j.molp.2019.02.001.
- 780 Hermisson, J., and Pennings, P.S. (2005). Soft sweeps: molecular population  
781 genetics of adaptation from standing genetic variation. *Genetics* 169, 2335-2352.  
782 10.1534/genetics.104.036947.
- 783 Hollister, J.D., and Gaut, B.S. (2009). Epigenetic silencing of transposable  
784 elements: a trade-off between reduced transposition and deleterious effects on  
785 neighboring gene expression. *Genome Res* 19, 1419-1428.  
786 10.1101/gr.091678.109.
- 787 Hollister, J.D., Smith, L.M., Guo, Y.L., Ott, F., Weigel, D., and Gaut, B.S. (2011).  
788 Transposable elements and small RNAs contribute to gene expression  
789 divergence between *Arabidopsis thaliana* and *Arabidopsis lyrata*. *Proc Natl Acad*  
790 *Sci U S A* 108, 2322-2327. 10.1073/pnas.1018222108.
- 791 Ito, H., Gaubert, H., Bucher, E., Mirouze, M., Vaillant, I., and Paszkowski, J.  
792 (2011). An siRNA pathway prevents transgenerational retrotransposition in plants  
793 subjected to stress. *Nature* 472, 115-119. 10.1038/nature09861.
- 794 Kalvari, I., Nawrocki, E.P., Argasinska, J., Quinones-Olvera, N., Finn, R.D.,  
795 Bateman, A., and Petrov, A.I. (2018). Non-Coding RNA Analysis Using the Rfam  
796 Database. *Curr Protoc Bioinformatics* 62, e51. 10.1002/cpbi.51.
- 797 Kindgren, P., Ivanov, M., and Marquardt, S. (2020). Native elongation transcript  
798 sequencing reveals temperature dependent dynamics of nascent RNAPII  
799 transcription in *Arabidopsis*. *Nucleic Acids Res* 48, 2332-2347.  
800 10.1093/nar/gkz1189.
- 801 Kippes, N., VanGessel, C., Hamilton, J., Akpinar, A., Budak, H., Dubcovsky, J.,  
802 and Pearce, S. (2020). Effect of phyB and phyC loss-of-function mutations on the  
803 wheat transcriptome under short and long day photoperiods. *BMC Plant Biol* 20,  
804 297. 10.1186/s12870-020-02506-0.
- 805 Koster, J., and Rahmann, S. (2012). Snakemake--a scalable bioinformatics  
806 workflow engine. *Bioinformatics* 28, 2520-2522. 10.1093/bioinformatics/bts480.
- 807 Krueger, F., and Andrews, S.R. (2011). Bismark: a flexible aligner and  
808 methylation caller for Bisulfite-Seq applications. *Bioinformatics* 27, 1571-1572.  
809 10.1093/bioinformatics/btr167.
- 810 Kruse, K., Hug, C.B., and Vaquerizas, J.M. (2020). FAN-C: a feature-rich  
811 framework for the analysis and visualisation of chromosome conformation  
812 capture data. *Genome Biol* 21, 303. 10.1186/s13059-020-02215-9.
- 813 Kuang, H., Padmanabhan, C., Li, F., Kamei, A., Bhaskar, P.B., Ouyang, S., Jiang,  
814 J., Buell, C.R., and Baker, B. (2009). Identification of miniature inverted-repeat  
815 transposable elements (MITEs) and biogenesis of their siRNAs in the  
816 Solanaceae: new functional implications for MITEs. *Genome Res* 19, 42-56.  
817 10.1101/gr.078196.108.
- 818 Kurihara, Y., Matsui, A., Kawashima, M., Kaminuma, E., Ishida, J., Morosawa,  
819 T., Mochizuki, Y., Kobayashi, N., Toyoda, T., Shinozaki, K., and Seki, M. (2008).  
820 Identification of the candidate genes regulated by RNA-directed DNA methylation  
821 in *Arabidopsis*. *Biochem Biophys Res Commun* 376, 553-557.  
822 10.1016/j.bbrc.2008.09.046.
- 823 Langmead, B., and Salzberg, S.L. (2012). Fast gapped-read alignment with  
824 Bowtie 2. *Nat Methods* 9, 357-359. 10.1038/nmeth.1923.
- 825 Langmead, B., Trapnell, C., Pop, M., and Salzberg, S.L. (2009). Ultrafast and  
826 memory-efficient alignment of short DNA sequences to the human genome.  
827 *Genome Biol* 10, R25. 10.1186/gb-2009-10-3-r25.

- 828 Lawrence, M., Gentleman, R., and Carey, V. (2009). rtracklayer: an R package  
829 for interfacing with genome browsers. *Bioinformatics* 25, 1841-1842.  
830 10.1093/bioinformatics/btp328.
- 831 Lawrence, M., Huber, W., Pages, H., Aboyoun, P., Carlson, M., Gentleman, R.,  
832 Morgan, M.T., and Carey, V.J. (2013). Software for computing and annotating  
833 genomic ranges. *PLoS Comput Biol* 9, e1003118. 10.1371/journal.pcbi.1003118.
- 834 Lei, Y., Lu, L., Liu, H.Y., Li, S., Xing, F., and Chen, L.L. (2014). CRISPR-P: a web  
835 tool for synthetic single-guide RNA design of CRISPR-system in plants. *Mol Plant*  
836 7, 1494-1496. 10.1093/mp/ssu044.
- 837 Li, H., Handsaker, B., Wysoker, A., Fennell, T., Ruan, J., Homer, N., Marth, G.,  
838 Abecasis, G., Durbin, R., and Genome Project Data Processing, S. (2009). The  
839 Sequence Alignment/Map format and SAMtools. *Bioinformatics* 25, 2078-2079.  
840 10.1093/bioinformatics/btp352.
- 841 Li, Q., Wu, G., Zhao, Y., Wang, B., Zhao, B., Kong, D., Wei, H., Chen, C., and  
842 Wang, H. (2020). CRISPR/Cas9-mediated knockout and overexpression studies  
843 reveal a role of maize phytochrome C in regulating flowering time and plant  
844 height. *Plant Biotechnol J* 18, 2520-2532. 10.1111/pbi.13429.
- 845 Li, X., Guo, K., Zhu, X., Chen, P., Li, Y., Xie, G., Wang, L., Wang, Y., Persson,  
846 S., and Peng, L. (2017). Domestication of rice has reduced the occurrence of  
847 transposable elements within gene coding regions. *BMC Genomics* 18, 55.  
848 10.1186/s12864-016-3454-z.
- 849 Liao, Y., Smyth, G.K., and Shi, W. (2014). featureCounts: an efficient general  
850 purpose program for assigning sequence reads to genomic features.  
851 *Bioinformatics* 30, 923-930. 10.1093/bioinformatics/btt656.
- 852 Lisch, D. (2013). How important are transposons for plant evolution? *Nat Rev*  
853 *Genet* 14, 49-61. 10.1038/nrg3374.
- 854 Liu, C. (2017). In Situ Hi-C Library Preparation for Plants to Study Their Three-  
855 Dimensional Chromatin Interactions on a Genome-Wide Scale. *Methods Mol Biol*  
856 1629, 155-166. 10.1007/978-1-4939-7125-1\_11.
- 857 Liu, S., Zhang, L., Gao, L., Chen, Z., Bie, Y., Zhao, Q., Zhang, S., Hu, X., Liu, Q.,  
858 Wang, X., and Wang, Q. (2022). Differential photoregulation of the nuclear and  
859 cytoplasmic CRY1 in Arabidopsis. *New Phytol* 234, 1332-1346.  
860 10.1111/nph.18007.
- 861 Love, M.I., Huber, W., and Anders, S. (2014). Moderated estimation of fold  
862 change and dispersion for RNA-seq data with DESeq2. *Genome Biol* 15, 550.  
863 10.1186/s13059-014-0550-8.
- 864 Lu, C., Chen, J., Zhang, Y., Hu, Q., Su, W., and Kuang, H. (2012). Miniature  
865 inverted-repeat transposable elements (MITEs) have been accumulated through  
866 amplification bursts and play important roles in gene expression and species  
867 diversity in *Oryza sativa*. *Mol Biol Evol* 29, 1005-1017. 10.1093/molbev/msr282.
- 868 Lu, C., Kulkarni, K., Souret, F.F., MuthuValliappan, R., Tej, S.S., Poethig, R.S.,  
869 Henderson, I.R., Jacobsen, S.E., Wang, W., Green, P.J., and Meyers, B.C.  
870 (2006). MicroRNAs and other small RNAs enriched in the Arabidopsis RNA-  
871 dependent RNA polymerase-2 mutant. *Genome Res* 16, 1276-1288.  
872 10.1101/gr.5530106.
- 873 Lyons, M., Cardle, L., Rostoks, N., Waugh, R., and Flavell, A.J. (2008). Isolation,  
874 analysis and marker utility of novel miniature inverted repeat transposable  
875 elements from the barley genome. *Mol Genet Genomics* 280, 275-285.  
876 10.1007/s00438-008-0363-0.

- 877 Matzke, M.A., Kanno, T., and Matzke, A.J. (2015). RNA-Directed DNA  
878 Methylation: The Evolution of a Complex Epigenetic Pathway in Flowering Plants.  
879 *Annu Rev Plant Biol* 66, 243-267. 10.1146/annurev-arplant-043014-114633.
- 880 Maumus, F., and Quesneville, H. (2014). Ancestral repeats have shaped  
881 epigenome and genome composition for millions of years in *Arabidopsis thaliana*.  
882 *Nat Commun* 5, 4104. 10.1038/ncomms5104.
- 883 Nishida, H., Ishihara, D., Ishii, M., Kaneko, T., Kawahigashi, H., Akashi, Y.,  
884 Saisho, D., Tanaka, K., Handa, H., Takeda, K., and Kato, K. (2013). Phytochrome  
885 C is a key factor controlling long-day flowering in barley. *Plant Physiol* 163, 804-  
886 814. 10.1104/pp.113.222570.
- 887 Oki, N., Yano, K., Okumoto, Y., Tsukiyama, T., Teraishi, M., and Tanisaka, T.  
888 (2008). A genome-wide view of miniature inverted-repeat transposable elements  
889 (MITEs) in rice, *Oryza sativa* ssp. *japonica*. *Genes Genet Syst* 83, 321-329.  
890 10.1266/ggs.83.321.
- 891 Pasha, A., Subramaniam, S., Cleary, A., Chen, X., Berardini, T., Farmer, A.,  
892 Town, C., and Provart, N. (2020). AraPort Lives: An Updated Framework for  
893 *Arabidopsis* Bioinformatics. *Plant Cell* 32, 2683-2686. 10.1105/tpc.20.00358.
- 894 Quadrana, L., Bortolini Silveira, A., Mayhew, G.F., LeBlanc, C., Martienssen,  
895 R.A., Jeddloh, J.A., and Colot, V. (2016). The *Arabidopsis thaliana* mobilome  
896 and its impact at the species level. *Elife* 5. 10.7554/eLife.15716.
- 897 Rice, P., Longden, I., and Bleasby, A. (2000). EMBOSS: the European Molecular  
898 Biology Open Software Suite. *Trends Genet* 16, 276-277. 10.1016/s0168-  
899 9525(00)02024-2.
- 900 SanMiguel, P., Gaut, B.S., Tikhonov, A., Nakajima, Y., and Bennetzen, J.L.  
901 (1998). The paleontology of intergene retrotransposons of maize. *Nat Genet* 20,  
902 43-45. 10.1038/1695.
- 903 Sasaki, T., Lee, T.F., Liao, W.W., Naumann, U., Liao, J.L., Eun, C., Huang, Y.Y.,  
904 Fu, J.L., Chen, P.Y., Meyers, B.C., et al. (2014). Distinct and concurrent pathways  
905 of Pol II- and Pol IV-dependent siRNA biogenesis at a repetitive trans-silencer  
906 locus in *Arabidopsis thaliana*. *Plant J* 79, 127-138. 10.1111/tpj.12545.
- 907 Schmitz, R.J., He, Y., Valdes-Lopez, O., Khan, S.M., Joshi, T., Urich, M.A., Nery,  
908 J.R., Diers, B., Xu, D., Stacey, G., and Ecker, J.R. (2013). Epigenome-wide  
909 inheritance of cytosine methylation variants in a recombinant inbred population.  
910 *Genome Res* 23, 1663-1674. 10.1101/gr.152538.112.
- 911 Schnable, P.S., Ware, D., Fulton, R.S., Stein, J.C., Wei, F., Pasternak, S., Liang,  
912 C., Zhang, J., Fulton, L., Graves, T.A., et al. (2009). The B73 maize genome:  
913 complexity, diversity, and dynamics. *Science* 326, 1112-1115.  
914 10.1126/science.1178534.
- 915 Seren, U., Grimm, D., Fitz, J., Weigel, D., Nordborg, M., Borgwardt, K., and Korte,  
916 A. (2017). AraPheno: a public database for *Arabidopsis thaliana* phenotypes.  
917 *Nucleic Acids Res* 45, D1054-D1059. 10.1093/nar/gkw986.
- 918 Sotelo-Silveira, M., Chavez Montes, R.A., Sotelo-Silveira, J.R., Marsch-Martinez,  
919 N., and de Folter, S. (2018). Entering the Next Dimension: Plant Genomes in 3D.  
920 *Trends Plant Sci* 23, 598-612. 10.1016/j.tplants.2018.03.014.
- 921 Stuart, T., Eichten, S.R., Cahn, J., Karpievitch, Y.V., Borevitz, J.O., and Lister, R.  
922 (2016). Population scale mapping of transposable element diversity reveals links  
923 to gene regulation and epigenomic variation. *Elife* 5. 10.7554/eLife.20777.
- 924 Tittel-Elmer, M., Bucher, E., Broger, L., Mathieu, O., Paszkowski, J., and Vaillant,  
925 I. (2010). Stress-induced activation of heterochromatic transcription. *PLoS Genet*  
926 6, e1001175. 10.1371/journal.pgen.1001175.

927 Underwood, C.J., Vijverberg, K., Rigola, D., Okamoto, S., Oplaat, C., Camp, R.,  
928 Radoeva, T., Schauer, S.E., Fierens, J., Jansen, K., et al. (2022). A  
929 PARTHENOGENESIS allele from apomictic dandelion can induce egg cell  
930 division without fertilization in lettuce. *Nat Genet* 54, 84-93. 10.1038/s41588-021-  
931 00984-y.  
932 Wu, N., Yao, Y., Xiang, D., Du, H., Geng, Z., Yang, W., Li, X., Xie, T., Dong, F.,  
933 and Xiong, L. (2022). A MITE variation-associated heat-inducible isoform of a  
934 heat-shock factor confers heat tolerance through regulation of JASMONATE ZIM-  
935 DOMAIN genes in rice. *New Phytol* 234, 1315-1331. 10.1111/nph.18068.  
936 Wu, R., Lucke, M., Jang, Y.T., Zhu, W., Symeonidi, E., Wang, C., Fitz, J., Xi, W.,  
937 Schwab, R., and Weigel, D. (2018). An efficient CRISPR vector toolbox for  
938 engineering large deletions in *Arabidopsis thaliana*. *Plant Methods* 14, 65.  
939 10.1186/s13007-018-0330-7.  
940 Xu, L., Yuan, K., Yuan, M., Meng, X., Chen, M., Wu, J., Li, J., and Qi, Y. (2020).  
941 Regulation of Rice Tillering by RNA-Directed DNA Methylation at Miniature  
942 Inverted-Repeat Transposable Elements. *Mol Plant* 13, 851-863.  
943 10.1016/j.molp.2020.02.009.  
944 Yang, G., Nagel, D.H., Feschotte, C., Hancock, C.N., and Wessler, S.R. (2009).  
945 Tuned for transposition: molecular determinants underlying the hyperactivity of a  
946 Stowaway MITE. *Science* 325, 1391-1394. 10.1126/science.1175688.  
947 Zhang, H., Tao, Z., Hong, H., Chen, Z., Wu, C., Li, X., Xiao, J., and Wang, S.  
948 (2016). Transposon-derived small RNA is responsible for modified function of  
949 WRKY45 locus. *Nat Plants* 2, 16016. 10.1038/nplants.2016.16.  
950 Zhang, X., and Wang, T. (2021). Plant 3D Chromatin Organization: Important  
951 Insights from Chromosome Conformation Capture Analyses of the Last 10 Years.  
952 *Plant Cell Physiol* 62, 1648-1661. 10.1093/pcp/pcab134.  
953 Zhou, M., and Law, J.A. (2015). RNA Pol IV and V in gene silencing: Rebel  
954 polymerases evolving away from Pol II's rules. *Curr Opin Plant Biol* 27, 154-164.  
955 10.1016/j.pbi.2015.07.005.

956

957

958

959

960

961

962

963

964

965

966

967

968 **Figure legends**

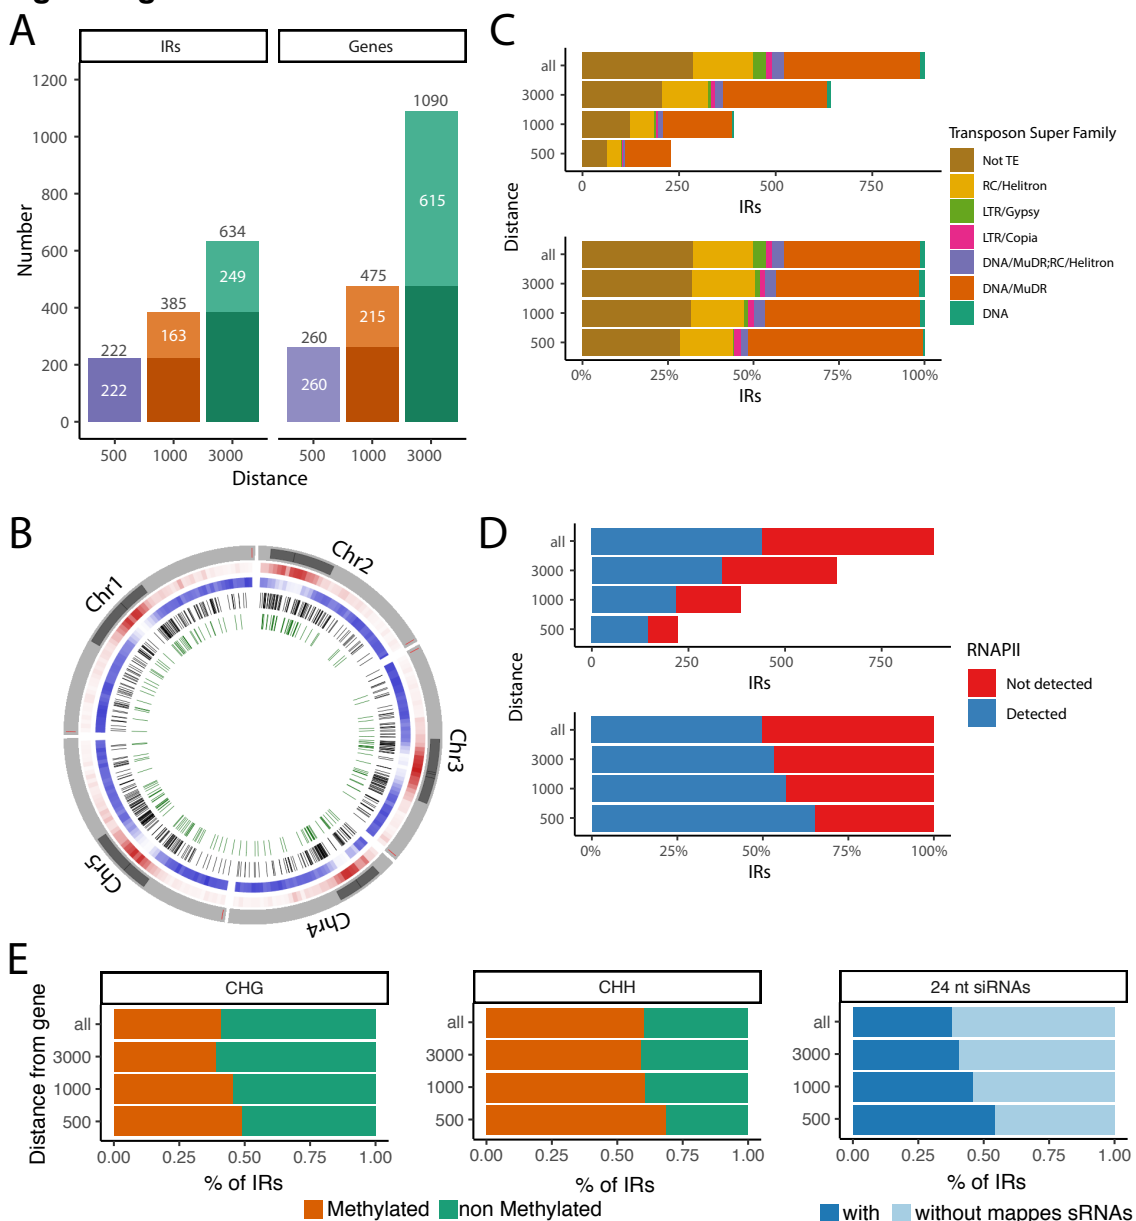

969

970

971

**Figure 1. IRs distribution near annotated genes in the *A. thaliana* Col-0 reference genome.**

972

973

974

975

976

977

978

979

980

**A.** Number of IRs detected in the Col-0 *genome* within 500, 1,000 and 3,000 bp from annotated genes (left), and the number of associated genes within the same size window from the identified IRs (right). White numbers indicate the number of IR and genes exclusive of the 0-500, 501-1000, and 1001-3000 bp windows while black numbers show the cumulative count.

**B.** Distribution of IRs. Outermost track, the five Arabidopsis chromosomes with the pericentromeric regions highlighted in darker gray. Then, TE density in 500 kb windows shown in red, and gene density in the same bins, in blue. In both red and blue tracks, darker color indicates higher density. The inner two tracks show

981 the distribution of all IRs (black bars) or only IRs within 3,000 bp upstream or  
982 downstream of annotated protein coding genes (green bars).

983 **C.** Classification of the identified IRs between annotated TE super families, only  
984 showing super families with at least five overlapping IRs. The  
985 “DNA/MuDR;RC/Helitron” category indicates IRs overlapping with TEs from both  
986 superfamilies. The upper panel shows the total number of IR in each superfamily  
987 while the bottom panel displays the percentage of each superfamily identified in  
988 each distance window from annotated genes.

989 **D.** Total number (up) or percentage (down) of IR nascent transcripts associated  
990 with RNAPII as detected by plaNet-Seq (Kindgren *et al.*, 2020). IRs producing  
991 transcripts associated with RNAPII are marked in blue and IRs without RNAPII  
992 transcripts in red.

993 **E.** Percentage of gene-adjacent IRs with cytosine methylation in the CHG (left)  
994 and CHH (center) contexts detected in at last 10% of the mapping reads and with  
995 24-nt siRNAs mapping to the IR sequence (at least 10 reads in at least one  
996 replicate).

997

998



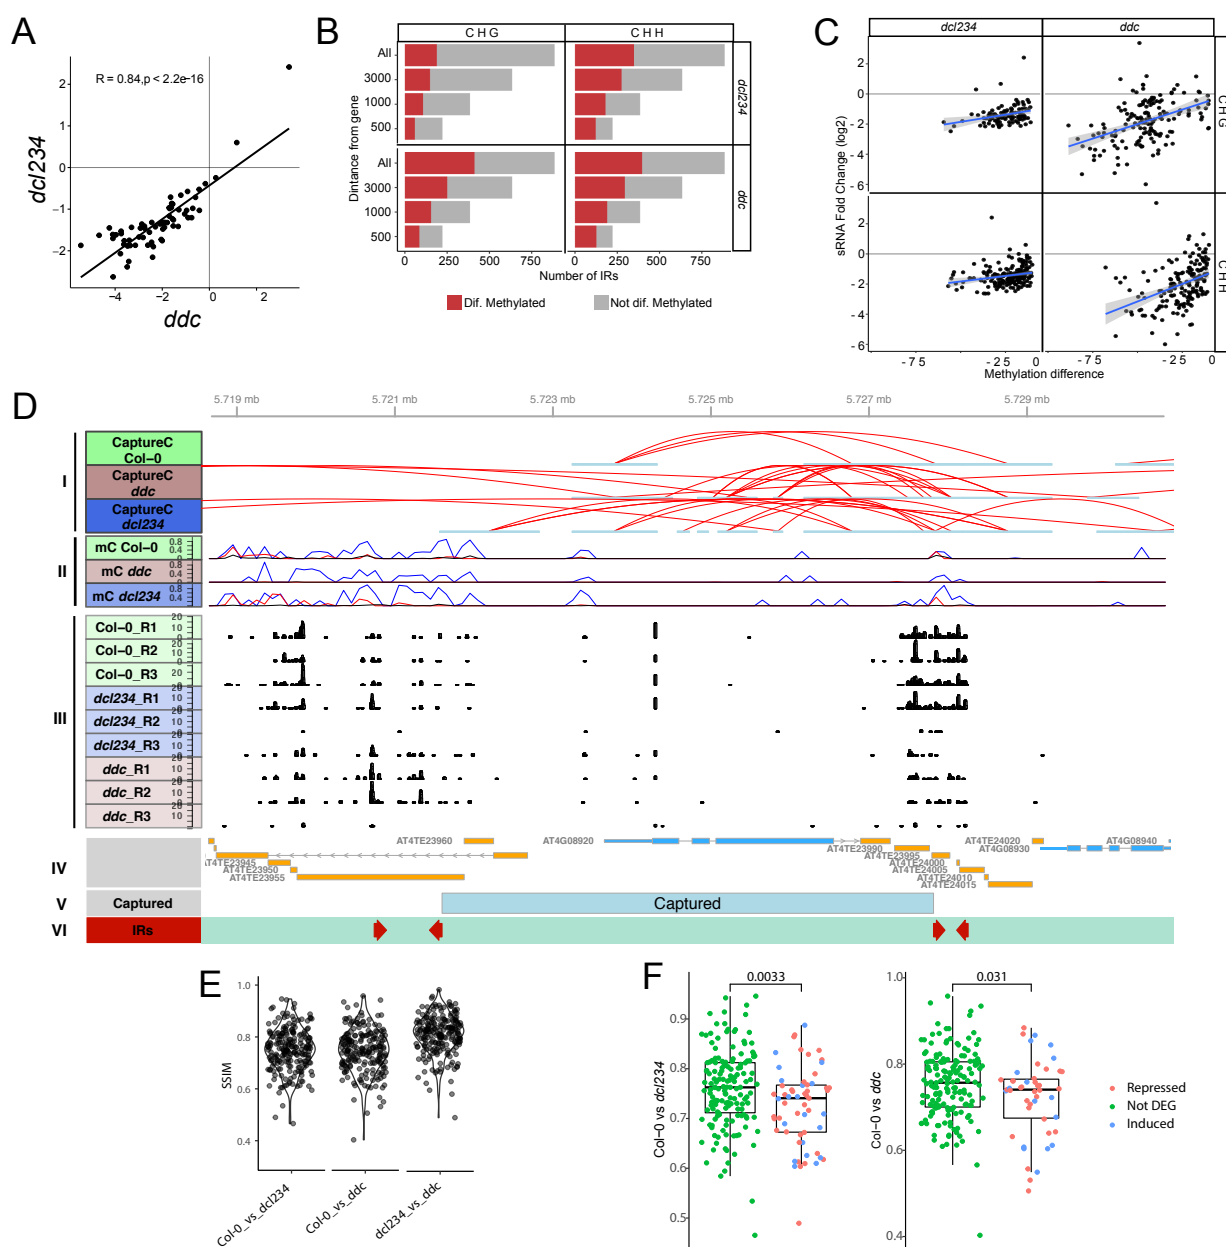

999

1000

1001

1002

1003

1004

1005

1006

1007

1008

1009

1010

1011

1012

1013

**Figure 2. IR near genes produce siRNAs, trigger DNA methylation and alter the local chromatin 3D organization.**

**A.** Changes in siRNA levels mapping to IRs in the *ddc* and *dcl234* mutants with respect to Col-0. The axes represent log<sub>2</sub> Fold Change of siRNA reads per million (RPM) over each IR. The correlation (R) is shown on the upper left corner.

**B.** Number of gene-associated IRs showing differential DNA methylation in the CHG and CHH contexts in the *ddc* and *dcl234* mutants with respect to Col-0.

**C.** Scatter plots showing the relation between changes in siRNA levels and DNA methylation over each gene-associated IRs in both mutants, *ddc* and *dcl234*. The blue lines show the linear regression while the gray shades show the confidence interval.

**D.** Region of the Col-0 genome containing the *CRY1* locus displaying the epigenetic and topological profile. (I) Chromatin interactions as detected by Capture-C experiments and shown by red lines indicating interacting fragments.

1014 (II) Cytosine DNA methylation in CG (blue), CHG (red) and CHH (black) contexts.  
 1015 (III) 24 nt siRNAs mapping to the genomic regions as determined by sRNA  
 1016 sequencing in biological triplicates of WT plants and *dcl234* and *ddc* mutants. (IV)  
 1017 Annotated genes (cyan) and transposons (yellow) in the region. (V) Region  
 1018 captured by the probes designed for the CaptureC experiment. (IV) IRs identified  
 1019 in this region of the genome.  
 1020 E. Structural similarity (SSIM) of captured regions in *dcl234* and *ddc* mutants with  
 1021 respect to Col-0 or to each other.  
 1022 F. SSIM of captured regions in *dcl234* and *ddc* mutants with respect to Col-0  
 1023 grouped by regions including differentially regulated genes (DEGs) or regions  
 1024 without DEGs (NotDEGs). The colors of the dots represent whether they are not  
 1025 differentially expressed, upregulated, or downregulated.

1026  
 1027

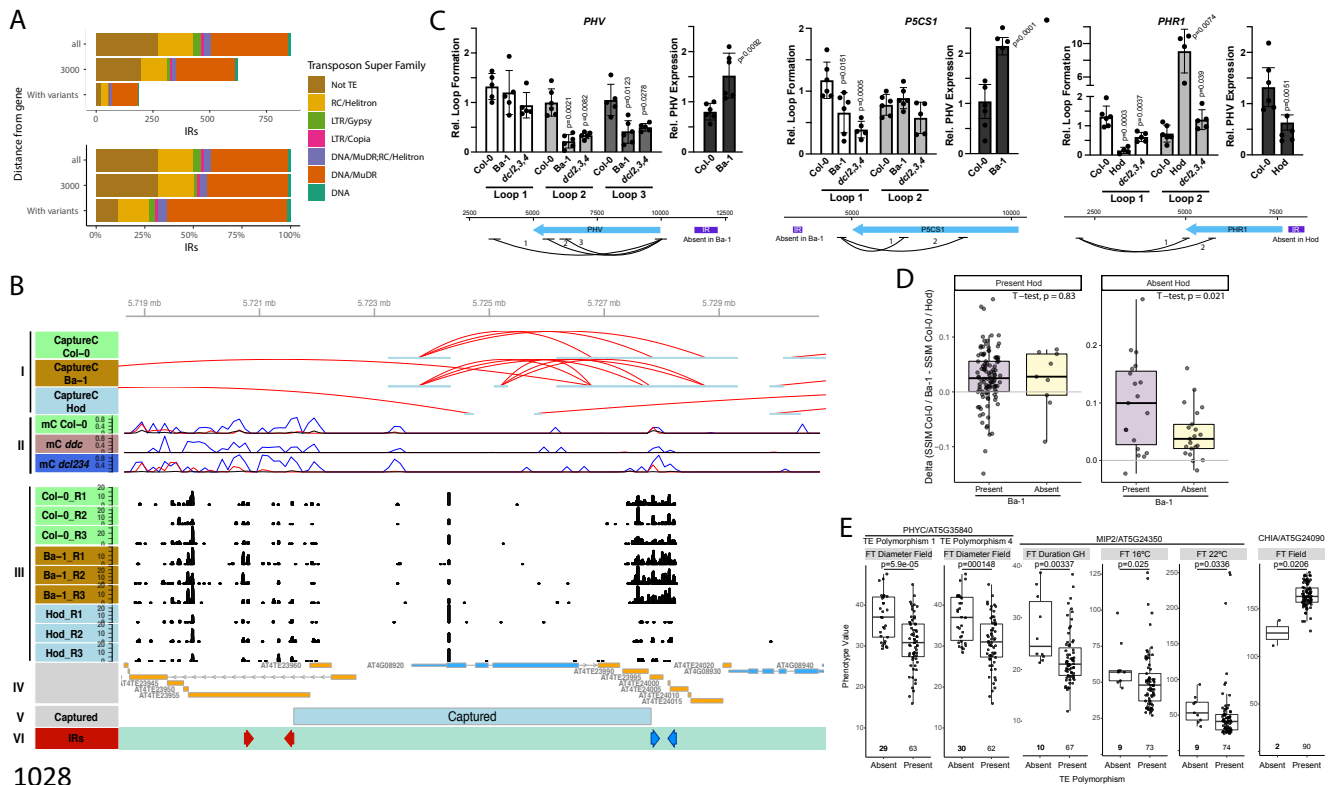

1028  
 1029 **Figure 3. Insertional polymorphisms of IRs near genes cause natural**  
 1030 **variation in short-range chromatin topology.**

1031 **A.** Number of IRs and polymorphic IRs associated with genes (upper panel).  
 1032 Percentage of IRs and polymorphic IRs by annotated TE superfamilies (lower  
 1033 panel). Only superfamilies with at least five overlapping IRs are displayed. The  
 1034 “DNA/MuDR;RC/Helitron” category indicates IRs overlapping with TEs from both  
 1035 superfamilies.

1036 **B.** Region of the Col-0 genome containing the *CRY1* locus with its epigenetic and  
 1037 topological profile. (I) Chromatin interactions as detected by Capture-C  
 1038 experiments from Col-0 and Ba-1 plants (both contain the IR) and Hod plants  
 1039 (which has a deletion polymorphism in the same IR). Red lines indicate

1040 interacting fragments. (II) Cytosine DNA methylation in CG (blue), CHG (red) and  
1041 CHH (black) contexts. (III) 24 nt siRNAs mapping to the genomic regions as  
1042 determined by sRNA sequencing in biological triplicates of wild-type Col-0, Ba-1  
1043 and Hod plants. (IV) Annotated genes (cyan) and transposons (yellow) in the  
1044 region. (V) Region captured by the probes designed for the Capture-C  
1045 experiment. (IV) IRs identified in this region of the genome. The IR is red is  
1046 conserved between the three genotypes while the IR in blue is missing in Hod.  
1047 **C.** RT-qPCR with total RNA, and Chromatin Conformation Capture (3C) qPCT  
1048 experiments to quantify the formation of specific chromatin loops as well as the  
1049 expression of the affected loci in WT, Ba-1, Hod plants and *dcl234* and *ddc*  
1050 mutants. Data are presented as mean values +/- SD. p-values were calculated  
1051 with two-tailed unpaired Student's t-Test with Welch's correction. n>4 biologically  
1052 independent samples. A diagram on the bottom of each gene shows the  
1053 chromatin loops amplified and confirmed by Sanger sequencing for each locus.  
1054 **D.** Delta of the structural similarity (SSIM) calculated with CHESS for the  
1055 contrasts Col-0 vs Ba-1 and Col-0 vs Hod for each captured region. Each  
1056 captured region is classified depending on whether the associated IR is present  
1057 or absent in the three analyzed accessions.  
1058 **E.** Association of flowering phenotypes (FT), including rosette diameter upon  
1059 flowering, flowering duration, and flowering time at different temperatures either  
1060 in plants grown in the field or green house (GH), with the presence or absence of  
1061 an IR near selected genes.  
1062

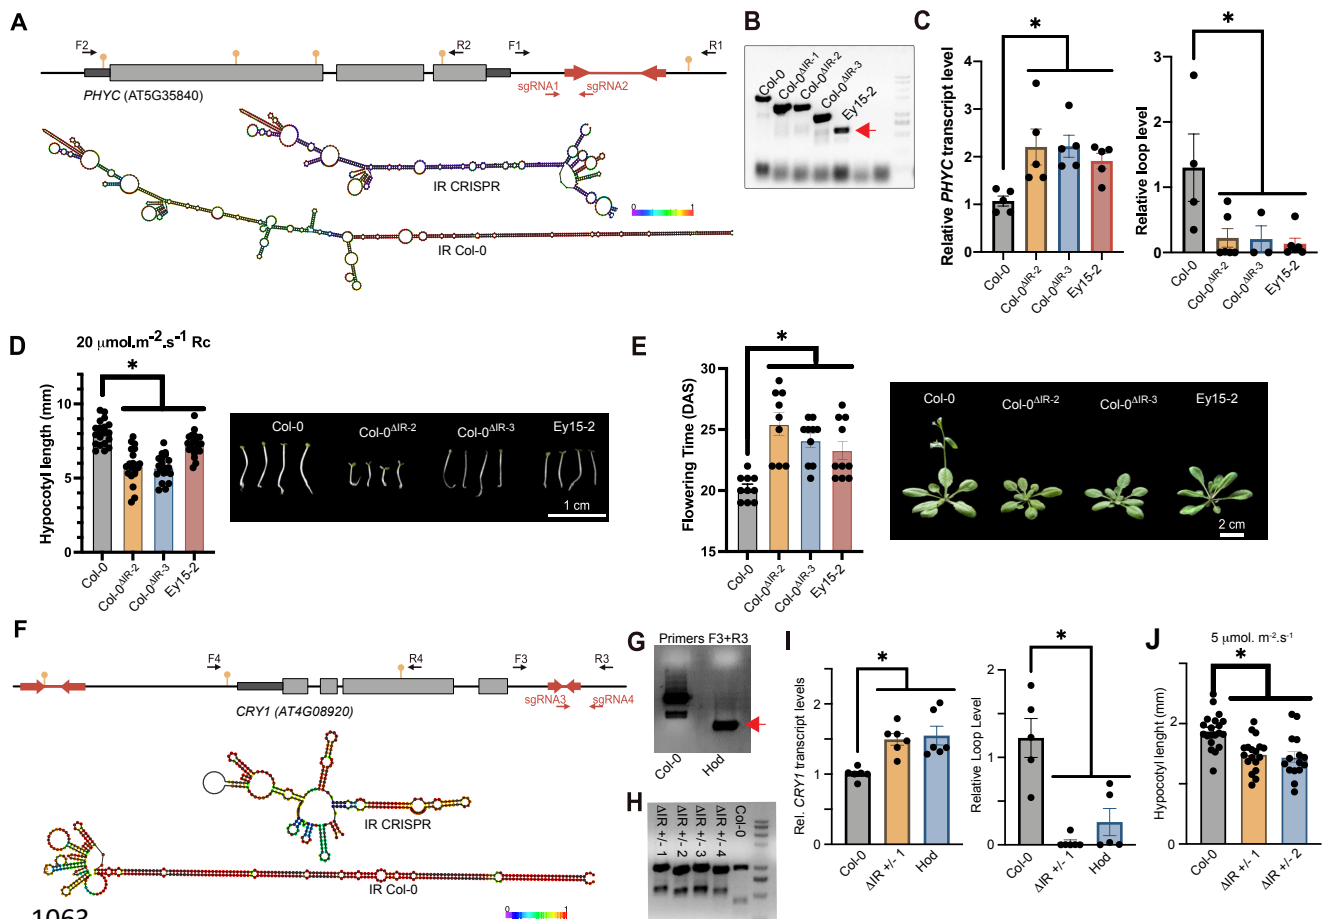

1063

1064

1065

1066

1067

1068

1069

1070

1071

1072

1073

1074

1075

1076

1077

1078

1079

1080

1081

1082

1083

1084

**Figure 4. Insertional polymorphisms of IRs near *PHYC* and *CRY1* cause changes in the loci topology, expression and associated phenotypes.**

**A.** *PHYC* locus diagram showing the position of the IR, restriction sites for EcoRI used for 3C experiments (yellow pins), the sgRNAs used for CRISPR/Cas9 deletion (sgRNA1 and sgRNA2), and primer positions. Predicted secondary RNA structures for the IR transcript in Col-0 plants or in the CRISPR-edited plants are shown using a color scale corresponding to base pairing probability 0 (purple) to 1 (red).

**B.** PCR using F1-R1 primers on genomic DNA, confirming partial deletion of the IR in the CRISPR lines and complete absence of the IR in Ey15-2 accession. Red arrowhead indicates the band sequenced to confirm the absence of the polymorphic IR in the Ey15-2 accession.

**C.** *PHYC* relative expression as measured by RT-qPCR and normalized against *ACT2* (left panel). Quantification of the formation of a short-range chromatin loop by 3C-qPCR analysis using EcoRI and F2-R2 primers (right panel). Data represents individual values + SEM of five independent biological replicates.

**D.** Hypocotyl length under Continuous Red light (Rc) regimen. Seedlings were grown under Rc light  $20 \mu\text{mol m}^{-2} \text{s}^{-1}$  for four days before measurement.

**E.** Flowering time for the different genotypes expressed as days after sowing (DAS). Data represents individual values  $\pm$  SD, significant differences are indicated as \*, for  $P < 0.05$  in a one-way ANOVA.

1085 **F.** *CRY1* locus diagram showing the position of the IRs, restriction sites for XbaI  
1086 (yellow pins), the sgRNAs used for CRISPR/Cas9 deletion (sgRNA3 and  
1087 sgRNA4), and primer positions. On the bottom are the secondary RNA structures  
1088 as predicted by RNAfold for the Col-0 wildtype IR transcript and the CRISPR-  
1089 edited outcome of the same IR. Color scale shows base pair probability 0 (purple)  
1090 to 1 (red).

1091 **G and H.** PCR using F3-R3 primers upon genomic DNA showing successful  
1092 partial deletion of the IR in CRISPR heterozygous lines and complete absence in  
1093 Hod plants. Red arrowhead indicates the band sequenced to confirm the absence  
1094 of the polymorphic IR in the Hod accession.

1095 **I.** *CRY1* expression analysis measured by RT-qPCR normalized against *ACT2*  
1096 on the left. Quantification of a chromatin loop by 3C-qPCR using XbaI and F4-R4  
1097 primers (right panel). Data represents average values of three independent  
1098 biological replicates with SEM.

1099 **J.** Hypocotyl length in continuous blue light. Seedlings were grown under blue  
1100 light  $5 \mu\text{mol m}^{-2} \text{s}^{-1}$  for four days before measured.

1101 In all cases data represent individual values  $\pm$  SD, significant differences are  
1102 indicated as \*, for  $P < 0.05$  in a one-way ANOVA.

1103
